# Supplementary material for: Suicide Attempts Among 1,437 Adolescents Aged 12–17 Years Attending Junior High Schools in Ghana
Source: Atypon-hosted journal article supplement (doi:10.1027/0227-5910/a000746), 2020-12-04
Supplement: 0227-5910_a000746_esm1.pdf [file 0227-5910_a000746_esm1.pdf]

## Electronic Supplementary Material 1

Table E1. Coding of demographic variables and exposure factors included study, and missing data

| Variable                     | Survey question                                                                                                       | Response coding                     | Observation / Missing (%) |
|------------------------------|-----------------------------------------------------------------------------------------------------------------------|-------------------------------------|---------------------------|
| Gender                       | What is your sex                                                                                                      | Male (0)<br>Female (1)              | N = 1437 / 0 (0%)         |
| Age                          | How old are you?                                                                                                      | 12–17 years (continuous)            | N = 1437 / 0 (0%)         |
| Grade                        | In what grade are you?                                                                                                | JHS 1 (0)<br>JHS 2 (1)<br>JHS 3 (2) | N = 1437 / 0 (0%)         |
| Loneliness                   | During the past 12 months, how often have you felt lonely?                                                            | Never (0)<br>Rarely–always (1)      | N = 1431 / 6 (0.4%)       |
| Anxiety                      | During the past 12 months, how often have you been so worried about something that you could not sleep at night?      | Never (0)<br>Rarely–always (1)      | N = 1430 / 7 (0.5%)       |
| Alcohol use                  | During the past 30 days, on how many days did you have at least one drink containing alcohol?                         | None (0)<br>1 or more (1)           | N = 1393 / 44 (3.1%)      |
| Parental understanding       | During the past 30 days, how often did your parents or guardians understand your problems and worries?                | Never (0)<br>Rarely–always (1)      | N = 1418 / 19 (1.3%)      |
| Parental monitoring          | During the past 30 days, how often did your parents or guardians really know what you were doing with your free time? | Never (0)<br>Rarely–always (1)      | N = 1364 / 73 (5.1%)      |
| Homework checking by parents | During the past 30 days, how often did your parents or guardians check to see if your homework was done?              | Never (0)<br>Rarely–always (1)      | N = 1424 / 13 (0.9%)      |
| Food deprivation             | During the past 30 days, how often did you go hungry because there was not enough food in your home?                  | Never (0)<br>Rarely–always (1)      | N = 1431 / 6 (0.4%)       |
| Truancy                      | During the past 30 days, how many days did you miss classes or school without permission?                             | None (0)<br>1 or more (1)           | N = 1412 / 25 (1.7%)      |
| Bullying victimisation       | During the past 30 days, how many days were you bullied?                                                              | Never (0)<br>1 or more (1)          | N = 1271 / 166 (11.6%)    |
| Social support at school     | During the past 30 days, how often were most of the students in your school kind and helpful?                         | Never (0)<br>Rarely–always (1)      | N = 1417 / 20 (1.4%)      |
| Being sexually active        | During your life, with how many people have you had sexual intercourse with?                                          | None (0)<br>1 or more (1)           | N = 1317 / 120 (8.4%)     |
| Number of close friends      | How many close friends do you have?                                                                                   | None (0)<br>1 or more (1)           | N = 1416 / 21 (1.5%)      |
| Physical fights              | During the past 12 months, how many times were you in a physical fight?                                               | None (0)<br>1 or more (1)           | N = 1433 / 4 (0.3%)       |
| Suicide attempt              | During the past 12 months, how many times did you actually attempt suicide?                                           | Never (0)<br>1 or more (1)          | N = 1437 / 0 (0%)         |
